# Supplementary material for: Microencapsulation of bioactives for food applications
Source: Royal Society of Chemistry journal article supplement (doi:10.1039/c4fo01175a), 2015-01-01
Supplement: c4fo01175a1.pdf [file c4fo01175a1.pdf]

| Bioactive extract             | Class                         | Plant                               | Origin     | Studied part | Extraction                        | Encapsulation method                       | Encapsulation Material                                                        | Reference |
|-------------------------------|-------------------------------|-------------------------------------|------------|--------------|-----------------------------------|--------------------------------------------|-------------------------------------------------------------------------------|-----------|
| Anthocyanin extracts          | -                             | <i>Bactris guineensis</i> L.        | Colombia   | Fruits       | Methanol/acetic acid (19:1, v/v)  | Spray drying                               | Maltodextrin                                                                  | 69        |
|                               | -                             | <i>Daucus carota</i> L.             | Turkey     | Roots        | Ethanol                           | Spray drying                               | Maltodextrin and glucodry                                                     | 67        |
|                               | -                             | <i>Euterpe oleracea</i> Mart.       | Brazil     | Fruit pulp   | Juice                             | Spray drying                               | Maltodextrin, gum arabic and tapioca starch.                                  | 71        |
|                               | -                             | <i>Garcinia indica</i> Choisy       | India      | Fruit pulp   | Acidified water                   | Spray drying                               | Maltodextrin                                                                  | 68        |
|                               | -                             | <i>Myrciaria cauliflora</i> (Mart.) | Brazil     | Fruit peels  | Acidified ethanol                 | Rapid extraction of supercritical solution | Polyethyleneglycol and ethanol                                                | 94        |
|                               | -                             | <i>Myrciaria cauliflora</i> (Mart.) | Brazil     | Fruit peels  | Acidified ethanol                 | Internal gelation                          | Ca-alginate                                                                   | 94        |
|                               | -                             | <i>Myrciaria jaboticaba</i> (Mart.) | Brazil     | Fruit peels  | Acified ethanol                   | Spray-drying                               | Maltodextrin, arabic gum and Capsul™                                          | 82        |
|                               | -                             | <i>Vaccinium</i> genus              | Germany    | Fruits       | n.a                               | Spray drying                               | Maltodextrin, citric acid, pectins and caffeine                               | 70        |
|                               | -                             | <i>Vaccinium myrtillus</i> L.       | Commercial | Fruits       | n.a                               | Emulsion                                   | Whey proteins                                                                 | 118       |
| -                             | <i>Vaccinium myrtillus</i> L. | Commercial                          | Fruits     | n.a          | Emulsion                          | Pectin and PGPR                            | 110                                                                           |           |
| Carotenoids                   | Curcumin                      | -                                   | Commercial |              | n.a                               | Emulsion                                   | Surfactants (SDS STAB, Tween 20 and poloxamer) and solvents (cotton seed oil) | 114       |
|                               | Curcumin                      | -                                   | Commercial |              | n.a                               | Liposomes                                  | Lecithin                                                                      | 127       |
|                               | Curcumin                      | -                                   | Commercial |              | n.a                               | Complex coacervation                       | κ-Carrageenan and lysozyme                                                    | 159       |
|                               | Lutein                        | -                                   | Commercial |              | n.a                               | Complex coacervation                       | Gelatin/gum arabic                                                            | 104       |
|                               | β-carotene                    | -                                   | Commercial |              | n.a                               | Freeze-drying                              | <i>Araucaria angustifolia</i> seeds starch                                    | 100       |
|                               | β-carotene                    | -                                   | Commercial |              | n.a                               | Freeze-drying                              | Normal and modified <i>Araucaria angustifolia</i> seeds starch and gelatin    | 101       |
|                               | β-carotene                    | <i>Capsicum annuum</i> L.           | Mexico     | Fruits       | Oils (corn, sunflower, safflower) | Spray drying                               | Gum arabic and maltodextrin                                                   | 53        |
|                               | β-carotene                    | -                                   | Commercial |              | n.a                               | Spray-drying                               | Gum arabic                                                                    | 54        |
| Carotenoids and vitamins      | Curcumin and retinol          | -                                   | Commercial |              | n.a                               | Emulsion and biopolymers particules        | Casein protein                                                                | 109       |
| Crude and fatty acid extracts | -                             | Fish oil                            | Russia     | Oil          | Hydrolysis                        | Emulsification diffusion and precipitation | Benzyl alcohol and Poloxamer 188                                              | 111       |
|                               | -                             | <i>Pinus sibirica</i> Du Tour       | Russia     | Seeds        | n.a                               | Emulsification diffusion and precipitation | Benzyl alcohol and Poloxamer 188                                              | 111       |

|                |                |                                                                                                                                                                                                        |            |              |                               |                                               |                                        |     |
|----------------|----------------|--------------------------------------------------------------------------------------------------------------------------------------------------------------------------------------------------------|------------|--------------|-------------------------------|-----------------------------------------------|----------------------------------------|-----|
|                | -              | <i>Thymallus baikalensis</i><br>Dybowski                                                                                                                                                               | Russia     | Muscle       | Ethanol                       | Emulsification diffusion<br>and precipitation | Benzyl alcohol and Poloxamer 188       | 111 |
| Crude extracts | -              | <i>Bidens pilosa</i> L.                                                                                                                                                                                | Brazil     | Aerial parts | Ethanol                       | Spray-drying                                  | Cellulose and Aerosil®                 | 48  |
|                | -              | <i>Camellia sinensis</i> L.                                                                                                                                                                            | China      | leaves       | Ethanol                       | Emulsion                                      | $\beta$ -Cyclodextrin                  | 121 |
|                | -              | <i>Camellia sinensis</i> L.                                                                                                                                                                            | Spain      | Leaves       | Acetone                       | Supercritical antisolvent<br>process          | Poly( $\epsilon$ -caprolactone)        | 130 |
|                | -              | <i>Eugenia uniflora</i> L.                                                                                                                                                                             | Brazil     | Fruits       | Juice                         | Lyophilization                                | Xanthan, tara and xanthan-tara<br>gums | 141 |
|                | -              | <i>Fadogia ancylantha</i> Schweinf.                                                                                                                                                                    | Italy      | Aerial parts | Ethanol/water (70:30,<br>v/v) | Spray drying                                  | Maltodextrin and pectin                | 44  |
|                | -              | Five herbs: <i>Paeonia<br/>suffruticosa</i> Andrews,<br><i>Phellodendron chinense</i><br>Schneid, <i>Lonicera japonica</i><br>Thunb, <i>Mentha Spicata</i> L. and<br><i>Atractylodes lancea</i> Thunb. | China      | Tea          | Water                         | Emulsion/Cross-linking                        | Alginate-chitosan                      | 106 |
|                | -              | <i>Garcinia cowa</i> Roxb                                                                                                                                                                              | India      | Fruits       | Water                         | Spray drying                                  | Whey protein (also denatured)          | 43  |
|                | -              | <i>Hibiscus sabdariffa</i> L.                                                                                                                                                                          | Commercial |              | Water                         | Spray-drying                                  | Milled citrus fibre                    | 47  |
|                | -              | <i>Hibiscus sabdariffa</i> L.                                                                                                                                                                          | Commercial |              | Water                         | Spray-drying                                  | Milled sugar cane fibre                | 50  |
|                | -              | <i>Ilex paraguariensis</i> A. St. Hil.                                                                                                                                                                 | Argentina  | Aerial parts | Water                         | Co-crystallization                            | Sucrose                                | 136 |
|                | -              | <i>Ipomoea batatas</i> L. Lam<br>variety, Sinjami                                                                                                                                                      | Korea      | Tuber        | n.a                           | Spray drying                                  | Maltodextrin and ascorbic acid         | 42  |
|                | -              | <i>Lippia sidoides</i> Cham.                                                                                                                                                                           | Brazil     | Leaves       | Ethanol/water (50:50,<br>v/v) | Spray drying                                  | Maltodextrin and gum arabic            | 45  |
|                | -              | <i>Melissa officinalis</i> L.                                                                                                                                                                          | Italy      | Aerial parts | Ethanol/water (70:30,<br>v/v) | Spray drying                                  | Maltodextrin and pectin                | 44  |
|                | -              | <i>Morinda citrifolia</i> L.                                                                                                                                                                           | Malasya    | Fruits       | Ethyl acetate                 | Spray-drying                                  | k-Carrageenan and maltodextrin         | 46  |
|                | -              | <i>Paeonia rokii</i> (S.G.Haw &<br>Lauener)                                                                                                                                                            | Italy      | Roots        | Polar                         | Spray-drying                                  | Chitosan                               | 52  |
|                | -              | <i>Piper sarmentosum</i> Roxb.                                                                                                                                                                         | Commercial |              | Water                         | Absorption                                    | Ca-alginate                            | 154 |
|                | -              | Propolis                                                                                                                                                                                               | Greece     |              | Ethanol                       | Sonification                                  | $\beta$ -cyclodextrin                  | 133 |
|                | -              | <i>Quercus resinosa</i> Liebm.                                                                                                                                                                         | Mexico     | Leaves       | Water                         | Spray-drying                                  | Lactose and sodium caseinate           | 51  |
|                | -              | <i>Solanum quitoense</i> L.                                                                                                                                                                            | Spain      | Pulp         | n.a                           | Spray-drying                                  | Arabic gum and maltodextrin            | 49  |
|                | -              | <i>Tussilago farfara</i> L.                                                                                                                                                                            | Italy      | Commercial   | n.a                           | Spray drying                                  | Maltodextrin and pectin                | 44  |
| Enzymes        | Cellulases and | -                                                                                                                                                                                                      | Commercial |              | n.a                           | Spray drying                                  | Alginate                               | 55  |

|                        |                                                                                                                 |                               |            |                    |         |                                  |                                                               |     |
|------------------------|-----------------------------------------------------------------------------------------------------------------|-------------------------------|------------|--------------------|---------|----------------------------------|---------------------------------------------------------------|-----|
|                        | xylanases                                                                                                       |                               |            |                    |         |                                  |                                                               |     |
|                        | Coenzyme Q10                                                                                                    | -                             | Commercial |                    | n.a     | spray drying.                    | Gum arabic, maltodextrin and modified starch                  | 56  |
| Essential oil          | Cardamom oleoresin                                                                                              | -                             | Commercial |                    | n.a     | Co-crystallization               | Sucrose                                                       | 137 |
|                        | Engenol and eugenyl acetate                                                                                     | <i>Syzygium aromaticum</i> L. | Brazil     | Buds               | Ethanol | Spray-drying                     | Lipid formulation                                             | 61  |
| Essential oil extracts | -                                                                                                               | <i>Citrus hydrix</i> D.C.     | Thailand   | Fruit skin         | Water   | Spray-drying                     | Konjac glucomannan and gum arabic                             | 58  |
|                        | -                                                                                                               | <i>Cymbopogon nardus</i> G.   | Commercial | Aerial parts       | n.a     | Spray-drying                     | Skimmed milk powder and whey protein                          | 57  |
|                        | -                                                                                                               | <i>Majorana hortensis</i> L.  | Commercial | Aerial parts       | n.a     | Spray-drying                     | Skimmed milk powder and whey protein                          | 57  |
|                        | -                                                                                                               | <i>Origanum vulgare</i> L.    | Commercial | Aerial parts       | n.a     | Spray-drying                     | Skimmed milk powder and whey protein                          | 57  |
|                        | -                                                                                                               | <i>Origanum vulgare</i> L.    | Commercial | Flowers and leaves | Water   | Spray-drying                     | Arabic gum, modified starch and maltodextrin                  | 59  |
|                        | -                                                                                                               | <i>Origanum vulgare</i> L.    | Portugal   | Flowers and leaves | Water   | Supercritical fluid impregnation | Sorghum and rice starch and supercritical CO <sub>2</sub>     | 62  |
| Fatty acid             | $\alpha$ -Linoleic acid                                                                                         | <i>Lepidium sativum</i> Linn. | India      | Seed               | Hexane  | Freeze-drying                    | Gum ghatti and arabic and soy protein                         | 102 |
|                        | $\omega$ -3 fatty acids                                                                                         | -                             | Commercial |                    | n.a     | Liposomes                        | Soybean phospholipids                                         | 129 |
|                        | $\omega$ -3 Fatty acids                                                                                         | -                             | Commercial |                    | n.a     | Spray-drying                     | Lecithin and chitosan                                         | 66  |
| Fatty acid extracts    | -                                                                                                               | -                             | Commercial |                    | n.a     | Emulsion                         | Soy protein and egg albumin.                                  | 119 |
|                        | -                                                                                                               | -                             | Commercial |                    | n.a     | Spray-drying                     | Gum arabic, maltodextrin, methyl cellulose and whey protein   | 63  |
|                        | -                                                                                                               | <i>Hibiscus cannabinus</i> L. | Japan      | Seeds              | Hexane  | Spray-drying                     | Sodium caseinate and maltodextrin                             | 64  |
|                        | -                                                                                                               | -                             | Commercial |                    | n.a     | Spray-drying                     | Gum arabic and maltodextrin                                   | 65  |
| Mixtures of bioactives | Fish oil, phytosterols (5 $\alpha$ -cholestane, $\beta$ -sitosterol, campesterol and stigmasterol) and limonene | -                             | Commercial |                    | n.a     | Emulsion/Spray-drying            | Milk proteins                                                 | 108 |
|                        | Fish oil, resveratrol and tributyrin                                                                            | -                             | Commercial |                    | n.a     | Emulsion                         | Caseinate, glucose and starch                                 | 112 |
| Oil extracts           | -                                                                                                               | -                             | Commercial |                    | n.a     | Emulsion                         | Non-ionicsurfactant (Tween 20,80 and 85) and solvents (sodium | 120 |

|                           |                             |                             |                   |                       |         |                         |                                                                                                   |     |
|---------------------------|-----------------------------|-----------------------------|-------------------|-----------------------|---------|-------------------------|---------------------------------------------------------------------------------------------------|-----|
|                           | -                           | -                           | Commercial        |                       | n.a     | Emulsion/Spray-chilling | phosphate buffer)<br>PGPR, FHCO and gelatinized<br>sweet potato starch                            | 150 |
|                           | -                           | <i>Ocimum basilicum L.</i>  | Commercial        | Flowers and<br>leaves | Water   | Spray-drying            | Gum arabic                                                                                        | 60  |
| Oils                      | Olive oil                   | -                           | Commercial        |                       | n.a     | Co-Extrusion            | Alginate                                                                                          | 123 |
| Organic acids             | Citric acid                 | -                           | Commercial        |                       | n.a     | Microwave               | Casein and inulin                                                                                 | 142 |
|                           | (-)-Hydroxycitric<br>acid   | <i>Garcinia cowa</i> Roxb   | India             | Fruit rinds           | Water   | Spray-drying            | Whey protein and maltodextrin                                                                     | 83  |
|                           | (-)-Hydroxycitric<br>acid   | <i>Garcinia cowa</i> Roxb   | India             | Fruit rinds           | Water   | Freeze-drying           | Whey protein and maltodextrin                                                                     | 99  |
|                           | (-)-Hydroxycitric<br>acid   | <i>Garcinia cowa</i> Roxb.  | India             | Fruit                 | Water   | Spray-drying            | Whey protein                                                                                      | 84  |
| Organosulfur<br>compounds | Allicin                     | <i>Allium sativum</i>       | China             | Bulb cloves           | n.a     | Fluidized bed           | Ethyl cellulose in acetone and<br>isopropanol                                                     | 134 |
| Phenolic<br>compounds     | Caffeine                    | -                           | Commercial        |                       | n.a     | Spray-drying            | Whey proteins and alginate                                                                        | 157 |
|                           | Catechins                   | <i>Camellia sinensis L.</i> | Korea             | Tea                   | n.a     | Freeze-drying           | Maltodextrin                                                                                      | 96  |
|                           | Chlorogenic acid            | <i>Nicotiana tabacum L.</i> | China             | Leaves                | Ethanol | Inclusion               | Cyclodextrin                                                                                      | 158 |
|                           | Ellagic acid                | -                           | Commercial        |                       | n.a     | Liposomes               | Lecithin/Chitosan-Dextran<br>sulphate                                                             | 126 |
|                           | Gallic acid                 | -                           | Commercial        |                       | n.a     | Lyophilization          | Chitosan, $\beta$ -cyclodextrin and<br>xanthan                                                    | 140 |
|                           | Gallic acid                 | -                           | Commercial        |                       | n.a     | Spray drying            | Mucilage extract of <i>Opuntia ficus<br/>indica</i>                                               | 72  |
|                           | Gallic acid                 | -                           | Commercial        |                       | n.a     | Spray drying            | Native and acetylated starch and<br>inulin                                                        | 73  |
|                           | Isoflavone                  | -                           | Commercial        |                       | n.a     | Emulsion                | Polyglycerol monostearate                                                                         | 116 |
|                           | Mangiferin                  | <i>Mangifera indica L.</i>  | Brazil/commercial | Bark                  | Hexane  | Spray drying            | Pectin and chitosan                                                                               | 74  |
|                           | Naringenin and<br>quercetin | -                           | Commercial        |                       | n.a     | Spray drying            | Cellulose acetate phthalate                                                                       | 75  |
|                           | Quercetin                   | -                           | Commercial        |                       | n.a     | Nanoprecipitation       | Eudragit® E and Polyvinyl alcohol                                                                 | 139 |
|                           | Quercetin and<br>vanillin   | -                           | Commercial        |                       | n.a     | Spray drying            | Sodium alginate, methyl- $\beta$ -<br>cyclodextrin,<br>hydroxypropylmethylcellulose and<br>inulin | 81  |

|                                 |   |                                              |            |                    |                             |                              |                                                                         |     |
|---------------------------------|---|----------------------------------------------|------------|--------------------|-----------------------------|------------------------------|-------------------------------------------------------------------------|-----|
| Quercitrin                      |   | <i>Albizia chinensis</i> L.                  | India      | Flowers            | Water/methanol (90:10, v/v) | Solvent evaporation          | Poly-D,L-lactide (PLA)                                                  | 145 |
| Resveratrol                     |   | <i>Arachis hypogaea</i> L.                   | Korea      | Sprout             | n.a                         | Response surface methodology | Medium-chain triacylglycerol/ whey protein, maltodextrin and gum arabic | 144 |
| Resveratrol                     |   | <i>Polygonum cuspidatum</i> Siebold & Zucc   | Italy      | Roots              | Methanol                    | Ultrasound                   | Cyclodextrins                                                           | 132 |
| Rutin and anthocyanins          |   | <i>Hibiscus sabdariffa</i> L.                | Nigeria    | Dried calyx        | Water                       | Spinning disc reactor        | High and low HLP lypophilic polimeric emulsifiers                       | 135 |
| Phytosterols ester extract      | - | -                                            | Commercial |                    | n.a                         | Inclusion                    | Amylose, amylopectin and amylose maize starch                           | 153 |
| Polyphenol and betalain extract | - | <i>Opuntia ficus-indica</i>                  | Chile      | Fruits             | Juice and ethanol           | Spray drying                 | Maltodextrin or inulin                                                  | 80  |
| Polyphenol and oil extracts     | - |                                              | Commercial |                    | n.a                         | Liposomes                    | DPPC and PEG <sub>2000</sub> -DSPE                                      | 128 |
| Polyphenol extracts             | - | <i>Achillea millefolium</i> L.               | Croatia    | Aerial parts       | Water                       | Electrostatic extrusion      | Alginate–chitosan                                                       | 105 |
|                                 | - | <i>Aristotelia chilensis</i> [Molina] Stuntz | Chile      | Leaves             | Ethanol/water (40:60, v/v)  | Emulsion                     | Gum arabic and liquid vaseline                                          | 115 |
|                                 | - | <i>Cabernet Sauvignon</i>                    | Argentina  | Fruits             | Juice (wine)                | Freeze-drying                | Maltodextrin                                                            | 98  |
|                                 | - | <i>Camellia sinensis</i> L.                  | China      | Leaves             | Ethanol                     | Internal gelation            | Chitosan                                                                | 107 |
|                                 | - | <i>Crategus laevigata</i> (Poir.) Dc.        | Croatia    | Aerial parts       | Water                       | Electrostatic extrusion      | Alginate–chitosan                                                       | 105 |
|                                 | - | <i>Glechoma hederacea</i> L.                 | Croatia    | Aerial parts       | Water                       | Electrostatic extrusion      | Alginate–chitosan                                                       | 105 |
|                                 | - | <i>Hypericum perforatum</i> L.               | Greece     | Leaves and flowers | Methanol                    | Molecular inclusion          | β-cyclodextrin                                                          | 155 |
|                                 | - | <i>Ilex paraguariensis</i> A. St. Hil.       | Argentina  | Aerial parts       | Water                       | Alginate beads               | Ca-alginate and Ca-alginate-chitosan                                    | 84  |
|                                 | - | <i>Myrica</i> genus                          | China      | Fruits             | Ethanol                     | Phase separation method      | Ethyl cellulose                                                         | 143 |
|                                 | - | <i>Olea europea</i> L.                       | Croatia    | Leaves             | Water                       | Electrostatic extrusion      | Alginate–chitosan                                                       | 105 |
|                                 | - | <i>Orthosiphon stamineus</i> Benth           | Malasya    | Leaves             | Water:Methanol (50:50, v/v) | Spray drying                 | Whey protein and maltodextrin                                           | 79  |
|                                 | - | <i>Prunus cerasus</i> L.                     | Turkey     | Pomace             | Ethanol/Water (50:50, v/v)  | Ultrasonication              | Maltodextrin and gum arabic                                             | 131 |
|                                 | - | <i>Punica granatum</i> L.                    | Turkey     | Peels              | Water                       | Spray drying                 | Maltodextrin                                                            | 77  |
|                                 | - | <i>Punica granatum</i> L.                    | Chile      | Fruits             | Ethanol and juice           | Spray-drying                 | Maltodextrin or soybean protein                                         | 73  |
|                                 | - | <i>Quercus resinosa</i> Liebm.               | México     | Leaves             | Water                       | Spray drying                 | k-Carrageenan and maltodextrin                                          | 73  |

|                             |                                       |                                           |            |                       |                                           |                                                |                                                     |     |
|-----------------------------|---------------------------------------|-------------------------------------------|------------|-----------------------|-------------------------------------------|------------------------------------------------|-----------------------------------------------------|-----|
| -                           |                                       | <i>Ribes nigrum</i> L.                    | Canada     | Pomace                | Ethanol/water/citric acid (80:20 v/v, 5%) | Spray drying                                   | Maltodextrin and inulin                             | 76  |
| -                           |                                       | <i>Rosmarinus officinalis</i> L.          | Spain      | Leaves                | Ethanol                                   | Supercritical antisolvent process              | Poloxamers                                          | 87  |
| -                           |                                       | <i>Rubus chamaemorus</i> L.               | Finland    | Fruits                | Water/acetone (70:30, v/v)                | Freeze-drying                                  | Maltodextrin                                        | 97  |
| -                           |                                       | <i>Rubus idaeus</i> L.                    | Croatia    | Leaves                | Water                                     | Electrostatic extrusion                        | Alginate–chitosan                                   | 105 |
| -                           |                                       | <i>Rubus ulmifolius</i> Schott            | Portugal   | Flowers               | Methanol/water (80:20, v/v)               | Atomization/coagulation                        | Alginate                                            | 92  |
| -                           |                                       | <i>Urtica dioica</i> L.                   | Croatia    | Leaves                | Water                                     | Electrostatic extrusion                        | Alginate–chitosan                                   | 105 |
| -                           |                                       | <i>Vaccinium myrtillus</i> L.             | Commercial | Fruits                | n.a                                       | Emulsion                                       | Whey protein                                        | 117 |
| -                           |                                       | <i>Vitis labrusca</i> L.                  | Brazil     | Seeds and fruits      | Water:ethanol (67.6:32.4, v/v)            | Spray-drying                                   | Maltodextrin                                        | 86  |
| -                           |                                       | <i>Vitis vinifera</i> L.                  | Germany    | Seed                  | Buffer acetate                            | Liposomes                                      | Soy lecithin                                        | 125 |
| -                           |                                       | -                                         | Commercial |                       | n.a                                       | Electrostatic extrusion                        | Ethylene vinyl acetate and low-density polyethylene | 122 |
| -                           |                                       | -                                         | Commercial |                       | n.a                                       | Liposomes                                      | Labrafac™, Phospholipon® 90G, Solutol® H515         | 125 |
| -                           |                                       | -                                         | Commercial |                       | n.a                                       | Niosomes                                       | Tween 60                                            | 156 |
| Protein extracts            | -                                     | <i>Pisum sativum</i> L.                   | Commercial | Grain                 | n.a                                       | Emulsion/Spray drying                          | Starch hydrolysates                                 | 152 |
|                             | -                                     | -                                         | Commercial |                       | n.a                                       | Core–Shell Printing                            | Stearic acid and carnauba wax                       | 138 |
| Proteins                    | Albumin and hirudin                   | -                                         | Commercial |                       | n.a                                       | Atomization/coagulation + surface modification | Chitosan/calcium alginate                           | 93  |
|                             | Papain                                | -                                         | Commercial |                       | n.a                                       | Alginate beads                                 | Flamboyant tree seed gum                            | 91  |
| Sugars                      | Glucose                               | -                                         | Commercial |                       | n.a                                       | Co-Extrusion                                   | Alginate                                            | 123 |
| Vitamin and enzyme extracts | -                                     | -                                         | Commercial |                       | n.a                                       | Emulsion                                       | Calcium caseinate                                   | 160 |
| Vitamin extracts            | -                                     | <i>Capsicum annum</i> L. variety Piquillo | Spain      | Seeds, skin and stems | CO <sub>2</sub>                           | Spray-drying                                   | Gum arabic                                          | 88  |
| Vitamins                    | Cobalamin ( vitamin B <sub>12</sub> ) | -                                         | Commercial |                       | n.a                                       | Co-Extrusion                                   | Alginate                                            | 123 |
|                             | Folic acid                            | -                                         | Commercial |                       | n.a                                       | Electrospraying and nanospray drying           | Whey protein and commercial starch                  | 103 |
|                             | Folic Acid                            | -                                         | Commercial |                       | n.a                                       | Solvent evaporation                            | Ethyl cellulose                                     | 146 |
|                             | Riboflavin (Vitamin B <sub>2</sub> )  | -                                         | Commercial |                       | n.a                                       | Emulsion                                       | Alginate–whey protein                               | 113 |

Riboflavin (Vitamin  
B<sub>2</sub>) -

Commercial

n.a

Alginate beads

Alginate-whey protein

89

---
